# Supplementary material
Source: PubMed Central journal article supplement (PMC10367768)
Supplement: NIHMS1905265-supplement-supplement.pdf [file NIHMS1905265-supplement-supplement.pdf]

---

**Supplementary information**

---

**Rapid detection of SARS-CoV-2 RNA in saliva via Cas13**

---

In the format provided by the authors and unedited

|    |                                                                                                  |
|----|--------------------------------------------------------------------------------------------------|
| 1  | <b>Contents</b>                                                                                  |
| 2  | Supplementary Table 1: LAMP primer sets screened, Related to Figure 2                            |
| 3  | Supplementary Table 2: LAMP, rLAMP, qRT-PCR, and Cas13 sequences                                 |
| 4  | Supplementary Table 3: Fluidics calibration volumes                                              |
| 5  | Supplementary Table 4. Cost breakdown                                                            |
| 6  | Supplementary Table 5. Clinical Saliva Sample Ct Values                                          |
| 7  | Supplemental Figure 1. Sample collection and inactivation workflow.                              |
| 8  | Supplemental Figure 2. Validation of rLAMP products.                                             |
| 9  | Supplemental Figure 3. Cas13 detection on all T7 insertion locations.                            |
| 10 | Supplemental Figure 4. Specificity testing of DISCoVER Assay.                                    |
| 11 | Supplemental Figure 5. Temperature characterization of the cartridge using a thermal calibration |
| 12 | cartridge.                                                                                       |
| 13 | Supplementary Video. Demonstration of the DISCoVER workflow.                                     |
| 14 |                                                                                                  |

15 **Supplementary Table 1: LAMP primer sets screened, Related to Figure 2**

| Lamp Primer Set | Time to Amplification (min) | NTC-Amplification time delta (min) | Amplicon length (nt) | Reference               |
|-----------------|-----------------------------|------------------------------------|----------------------|-------------------------|
| Orflab Set 1    | 11.6                        | 21.3                               | 9                    | (Rabe and Cepko 2020)   |
| N Set 2         | 12.2                        | 28.7                               | 26                   | (Joung et al., n.d.)    |
| N Set 1         | 12.5                        | 33.1                               | 46                   | (Broughton et al. 2020) |
| Nsp3 Set 1      | 13.2                        | 30.0                               | 1                    | (Park et al. 2020)      |
| Orflab Set 2    | 14.8                        | 25.4                               | 1                    | (Yu et al. 2020)        |
| N Set 3         | 14.5                        | 27.1                               | 27                   | (Zhang et al. 2020)     |
| N Set 4         | 15.7                        | 25.4                               | 27                   | (Zhang et al. 2020)     |

|              |      |      |    |                         |
|--------------|------|------|----|-------------------------|
| Orflab Set 3 | 16.7 | 21.5 | 0  | (Lamb et al., n.d.)     |
| E Set 1      | 18.0 | 27.6 | 60 | (Broughton et al. 2020) |

16

17 **Supplementary Table 2: LAMP, rLAMP, qRT-PCR, and Cas13 sequences**

18 See attached file

19

20 **Supplementary Table 3: Fluidics calibration volumes**

| Volumes (µL)    | Saliva | Primer Mix | Master Mix | Cas13+crRNA | T7mix + FQ |
|-----------------|--------|------------|------------|-------------|------------|
| <b>Loaded</b>   | 150    | 12         | 40         | 10          | 40         |
| <b>Lost</b>     | -      | 8          | 20         | 6           | 8          |
| <b>Reaction</b> | 16     | 4          | 20         | 4           | 32         |

21

22

23

24

25

26

27 **Supplementary Table 4. Cost breakdown**

| Reagents                            |                                              | Prototype (current version) | Point of Care (hypothetical) |
|-------------------------------------|----------------------------------------------|-----------------------------|------------------------------|
| Inactivation (per x saliva samples) |                                              | \$ 0.23                     | \$ 0.23                      |
|                                     |                                              |                             |                              |
| Assay (per cartridge)               |                                              |                             |                              |
|                                     | Primer mix                                   | \$0.42                      | \$0.42                       |
|                                     | Master mix                                   | \$5.51                      | \$5.51                       |
|                                     | Cas13                                        | \$0.17                      | \$0.17                       |
|                                     | T7 mix                                       | \$0.65                      | \$0.65                       |
|                                     | F/Q probe                                    | \$0.06                      | \$0.06                       |
|                                     | crRNA                                        | \$0.005                     | \$0.005                      |
|                                     | <b>Total (1 cartridge)</b>                   | <b>\$6.82</b>               | <b>\$6.82</b>                |
| Instrument                          |                                              |                             |                              |
|                                     | Electronic board with temperature controller | \$2000                      | \$50                         |
|                                     | Syringe pump                                 | \$2100                      | \$100                        |
|                                     | Solenoid valves                              | \$600                       | \$300                        |

|           |                             |                |                          |
|-----------|-----------------------------|----------------|--------------------------|
|           | Manifold components         | \$3500         | \$200                    |
|           |                             |                |                          |
|           | <b>Total (1 instrument)</b> | <b>\$8,200</b> | <b>\$650</b>             |
|           |                             |                | Production Volume - 500k |
| Cartridge | PMMA                        | \$20           | \$2                      |
|           | Adhesive                    | \$5            | \$0.7                    |
|           | Hydrophobic membranes       | \$2            | \$0.5                    |
|           | Silicone rubber sheet       | \$6            | \$2                      |
|           | Labor assembly              | \$75           | \$3                      |
|           | <b>Total (1 cartridge)</b>  | <b>\$103</b>   | <b>\$8</b>               |
|           |                             |                |                          |
| Detection |                             |                |                          |
|           | Eyepiece                    | \$170          | \$100                    |
|           | Camera                      | \$550          | \$10                     |
|           | Fluorescence filters        | \$25           | \$40                     |

|  |                                            |               |                |
|--|--------------------------------------------|---------------|----------------|
|  | Electronic<br>Controllers/boards           | \$300         | \$30           |
|  | LED                                        | \$296         | \$15           |
|  | Other hardware<br>(mounts, screws,<br>etc) | \$80          | \$40           |
|  | <b>Total (1 detection<br/>system)</b>      | <b>\$2583</b> | <b>~\$235*</b> |

28 \* An optical system designed to deliver similar detection limits but optimized for mass manufacture  
29 would have an estimated parts cost (very roughly, cost of goods sold) of less than \$250. In a unit  
30 redesigned for production at volume, the camera sensor, high-power LED, and microcontrollers  
31 drop to under ~\$10 each even in modest quantities. This leaves filters, optics, mounting and labor  
32 as the main cost drivers. Filter size can be reduced to the ~ 4mm diameter of the system aperture,  
33 reducing filter cost (on an areal basis) by > 25X to under ~ \$40, and optics (~ \$200) will also drop  
34 substantially at volume, approximating the low-cost objective they replace.

35 **Supplementary Table 5. Clinical Saliva Sample Ct Values**

| Ct    |       | Donor ID |
|-------|-------|----------|
| N     | ACTB  |          |
| 23.20 | 32.35 | 4        |
| 29.50 | 32.59 | 7        |
| 31.40 | 33.15 | 8        |
| 30.64 | 31.47 | 17       |
| 28.54 | 32.32 | 19       |
| 29.50 | 32.39 | 20       |
| 21.86 | 31.29 | 32       |
| 26.75 | 33.09 | 50       |
| 23.41 | 33.02 | 60       |
| 26.42 | 34.22 | 64       |
| 39.50 | 32.35 | 1        |
| 41.71 | 28.56 | 38       |
| 38.69 | 33.50 | 49       |

36

37

38

39

40

41

42

43



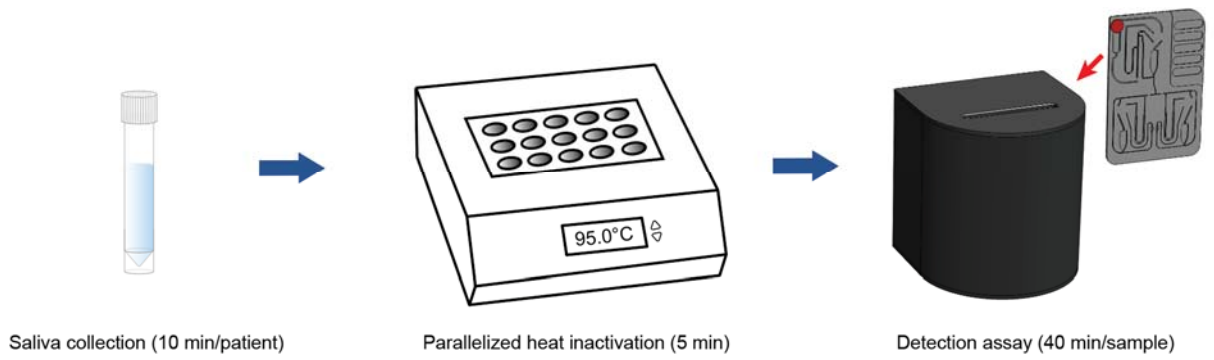

44

45 **Supplemental Figure 1. Sample collection and inactivation workflow.** Schematic of  
46 inactivation protocol. Clinical saliva could be collectively inactivated at 95C for 5 minutes before  
47 being processed individually onto the DISCOVER system.

48

49

50

51

52

53

54

55

56

57

58

59

60

61

62

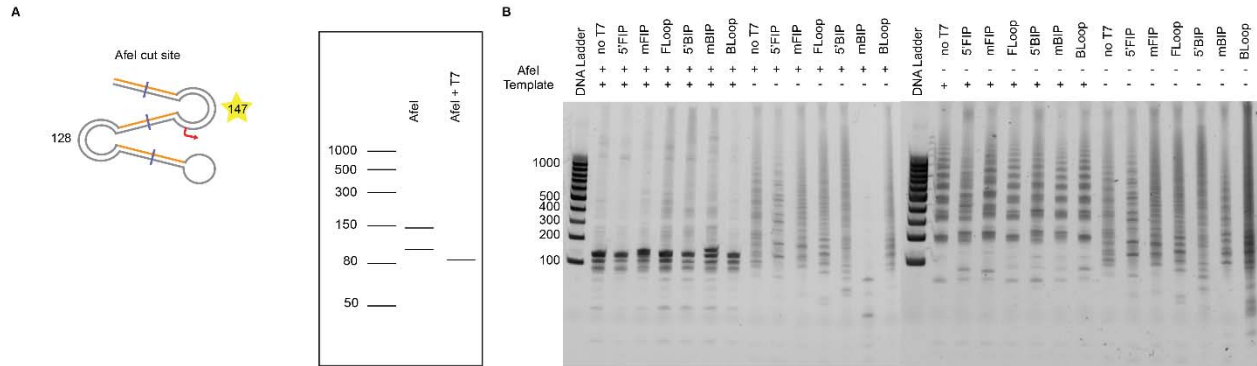

63

64 **Supplemental Figure 2. Validation of rLAMP products.** A. Schematic of primary mBIP  
 65 rLAMP products and sizes upon AfeI digestion (left). Virtual gel depicting expected AfeI  
 66 restriction digest bands (147 nt, 128 nt) and resulting transcription bands of mBIP rLAMP  
 67 products. Only the 147 nt product is expected to contain the T7 promoter, and thus produce an  
 68 ~85nt RNA product upon transcription. B. Restriction-digestion of each rLAMP product with each  
 69 primer set containing the different T7 insertion positions.

70

71

72

73

74

75

76

77

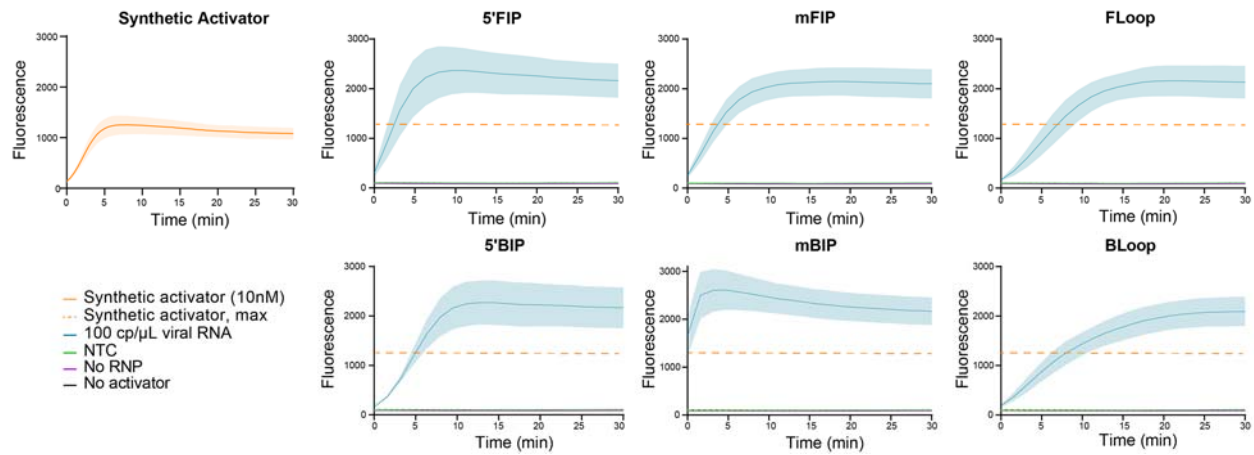

78

79 **Supplemental Figure 3. Cas13 detection on all T7 insertion locations**, with T7 transcription  
 80 and Cas13 detection occurring in the same reaction. The maximum fluorescence of the synthetic  
 81 activator at 10 nM is plotted (dashed line). Values are mean  $\pm$  SD with  $n = 3$ . NTC, no template  
 82 control. RNP, ribonucleoprotein.

83  
 84  
 85  
 86  
 87  
 88  
 89  
 90  
 91  
 92  
 93  
 94  
 95  
 96  
 97  
 98  
 99  
 100  
 101  
 102  
 103  
 104  
 105  
 106  
 107  
 108  
 109  
 110  
 111

112

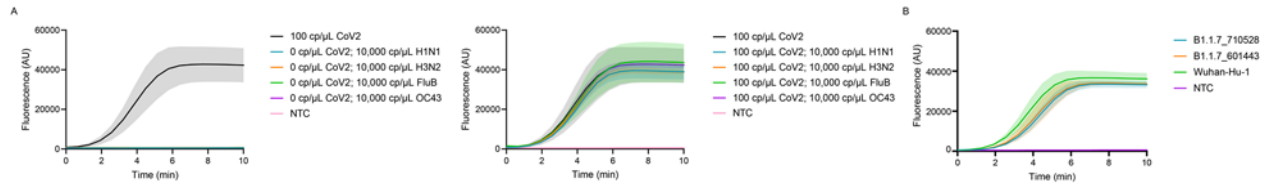

113

114 **Supplemental Figure 4. Specificity testing of DISCOVER Assay. A.** Detection of SARS-CoV-  
115 2 synthetic RNA in inactivated saliva in the presence of H1N2, H3N2, Influenza B, and human  
116 coronavirus OC43 synthetic viral RNA with N gene crRNA. Values are mean  $\pm$  SD with n = 3. **B.**  
117 Detection of synthetic SARS-CoV-2 B.1.1.7. variants in saliva at 50 cp/μL with N gene crRNA.  
118 Values are mean  $\pm$  SD with n = 3. NTC, no template control.

119

120

121

122

123

124

125

126

127

128

129

130

131

132

133

134

135

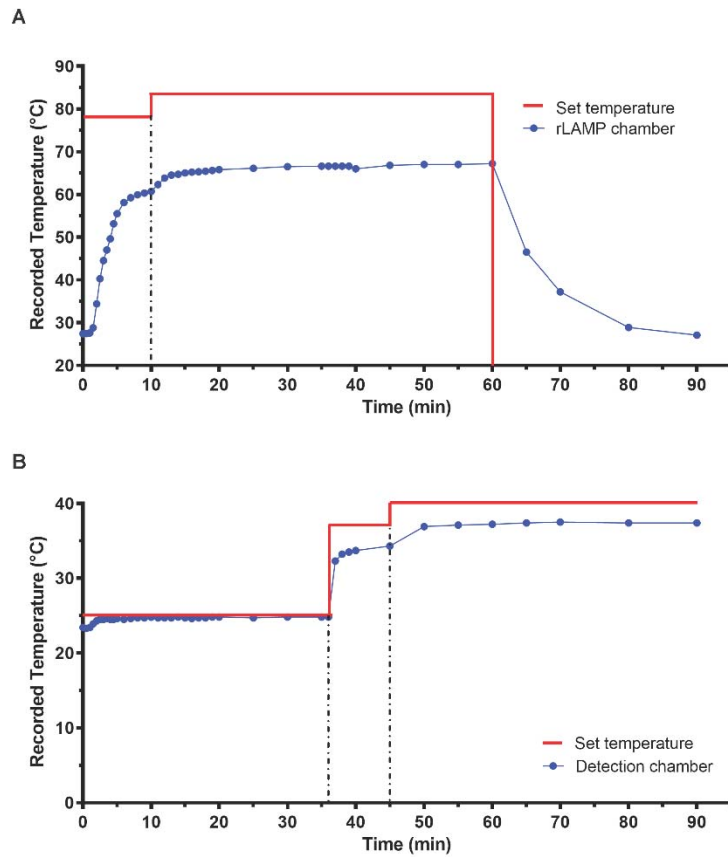

136

137 **Supplemental Figure 5. Temperature characterization of the cartridge using a thermal**  
 138 **calibration cartridge.** Graph showing the temperature measured via integrated thermal-epoxy  
 139 from the rLAMP chamber (A) and the detection chamber (B). On the x-axis, we showed the  
 140 different timepoints at which the temperature was changed on the user interface.

141

142

143

144

145

146

147

148  
149  
150  
151  
152  
153  
154  
155

**Supplementary Video. Demonstration of the DISCOVER workflow.** Test samples are collected into saliva collection tubes containing inactivation reagent. The sample is then heat-inactivated at 95°C for 5 minutes and applied to the microfluidic cartridge via transfer pipette. The DISCOVER cartridge comes pre-loaded with reagents necessary for executing the test. Patient information is then inputted into the computer, the cartridge is inserted into the device, and the software is started to begin the test. During the run, data is displayed in real time and automatically resulted.
